# Supplementary material
Source: HighWire-hosted journal article supplement (https://ard.bmj.com/highwire/filestream/202717/field_highwire_adjunct_files/0/ARD_table_1_154799.pdf)
Supplement: ARD_table_1_154799.pdf [file ARD_table_1_154799.pdf]

Supplementary Table 1. ASDAS response at weeks 24, 52, and 104.

|                                               | Placebo →<br>Golimumab 50 mg<br>(Group 1) | Golimumab 50 mg<br>(Group 2) | Golimumab 100 mg<br>(Group 3) |
|-----------------------------------------------|-------------------------------------------|------------------------------|-------------------------------|
| Proportion of patients with ASDAS score < 1.1 |                                           |                              |                               |
| Week 24                                       | 4/72 (5.6)                                | 26/129 (20.2)<br>p = 0.0054  | 26/136 (19.1)<br>p = 0.0081   |
| Week 52                                       | 12/69 (17.4)                              | 27/118 (22.9)<br>p = 0.3726  | 29/123 (23.6)<br>p = 0.3156   |
| Week 104                                      | 11/64 (17.2)                              | 35/104 (33.7)<br>p = 0.0201  | 29/113 (25.7)<br>p = 0.1952   |
| Proportion of patients with ASDAS score < 2.1 |                                           |                              |                               |
| Week 24                                       | 19/72 (26.4)                              | 68/129 (52.7)<br>p = 0.0003  | 71/136 (52.2)<br>p = 0.0003   |
| Week 52                                       | 50/69 (72.5)                              | 79/118 (66.9)<br>p = 0.4315  | 80/123 (65.0)<br>p = 0.2912   |
| Week 104                                      | 50/64 (78.1)                              | 82/104 (78.8)<br>p = 0.9119  | 74/113 (65.5)<br>p = 0.0778   |

ASDAS, Ankylosing Spondylitis Disease Activity Score  
All data are presented as n (%).
